# Supplementary material for: In Situ X-ray Diffraction at High Temperatures: Formation of Ca2SiO4 and Ternesite in Recycled Autoclaved Aerated Concrete
Source: MDPI journal article supplement (doi:10.3390/min11080789), 2021-07-21
Supplement: s1 [file s1]

## Supplementary:

**Table S1.** Structure models and additional parameters used for the Rietveld refinement.

| Phase                                                                           | Space group           | References                 |
|---------------------------------------------------------------------------------|-----------------------|----------------------------|
| Corundum                                                                        | R-3cH                 | Ishizawa et al. 1980 [58]  |
| <b>Raw materials</b>                                                            |                       |                            |
| $\alpha$ -Quartz                                                                | P3 <sub>2</sub> 21    | Le Page et al. 1976 [37]   |
| Calcite                                                                         | R-3cH                 | Chessin et al. 1965 [59]   |
| 11A Tobermorite                                                                 | B11m                  | Merlino et al. 2001 [60]   |
| Aragonite                                                                       | Pmcn                  | De Villiers 1971 [61]      |
| Vaterite                                                                        | P 6 <sub>3</sub> /mmc | Kamhi, S.R 1961 [62]       |
| Anhydrite                                                                       | Amma                  | Hawthorne et al. 1975 [63] |
| Bassanite                                                                       | I 1 2 1               | Bezou et al. 1991 [64]     |
| Microcline                                                                      | C-1                   | Allan et al. 1997 [65]     |
| Albite                                                                          | C-1                   | Winter et al. 1979 [66]    |
| <b>Calcination product</b>                                                      |                       |                            |
| $\alpha'$ -H-C <sub>2</sub> S                                                   | Pnma                  | Mumme et.al 1996 [35]      |
| $\beta$ -C <sub>2</sub> S                                                       | P12 <sub>1</sub> /n1  | Mumme et al. 1995 [53]     |
| Ternesite                                                                       | Pnma                  | Irran et al. 1997 [24]     |
| $\beta$ -Quartz                                                                 | P6 <sub>2</sub> 22    | Wright et al. 1981 [36]    |
| Lime                                                                            | Fm-3m                 | Huang et al. 1994 [67]     |
| Wollastonite                                                                    | P12 <sub>1</sub> /a1  | Hesse 1984 [68]            |
| Åkermanite-Gehlenite                                                            | P-42 <sub>1</sub> m   | Smith 1953 [69]            |
| Spurrite                                                                        | P12 <sub>1</sub> /a1  | Louisnathan 1971 [70]      |
| Browmillerite                                                                   | Ibm2                  | Grice 2005 [71]            |
| Ye'elimite                                                                      | I-43m                 | Colville et al. 1971 [72]  |
|                                                                                 |                       | Cuesta et al. 2014 [73]    |
| <b>Additional parameters for XRD measurement and Rietveld refinement</b>        |                       |                            |
| Background: Chebychev polynomial 4 <sup>th</sup> order, 1/X Bkg                 |                       |                            |
| Goniometer radius: 240 mm                                                       |                       |                            |
| Linear PSD                                                                      |                       |                            |
| 2Th angular range: 3.347°                                                       |                       |                            |
| FDS angle: 0.125°                                                               |                       |                            |
| Source length: 12 mm                                                            |                       |                            |
| RS length: 14 mm                                                                |                       |                            |
| Prim./Sec. Soller: 2.3°                                                         |                       |                            |
| LP factor: 0                                                                    |                       |                            |
| Zero error, sample displacement and sample length: refined for each measurement |                       |                            |

**Table S2.** Crystalline phase contents determined *in situ* in 100°C steps (*in situ* experiment step50).

| Sample and Temperature | $\alpha'$ -H-C <sub>2</sub> S | $\beta$ -C <sub>2</sub> S | Ternesite | Quartz   | Calcite   | Lime      | Anhydrite | Wollastonite |
|------------------------|-------------------------------|---------------------------|-----------|----------|-----------|-----------|-----------|--------------|
| <b>P 600</b>           |                               |                           |           | 18.0(8)  | 75.7(1.2) |           | 2.7(4)    |              |
| 700                    | 37.0(1.0)                     |                           |           | 13.4(6)  | 44.4(1.1) |           | 2.8(3)    |              |
| 800                    | 55.2(1.0)                     |                           |           | 7.1(4)   | 0.6(2)    | 24.4(5)   | 1.84(15)  | 9.2(4)       |
| 900                    | 68(2)                         |                           |           | 2.9(6)   |           | 17.6(7)   | 1.33(16)  | 4.3(5)       |
| 1000                   | 89.9(8)                       |                           | 2.2(4)    | 1.6(2)   |           | 0.03(2)   |           | 1.5(3)       |
| 900                    | 92.3(1.1)                     |                           | 1.3(3)    | 0.54(15) |           | 0.05(4)   |           | 1.6(3)       |
| 800                    | 93.9(9)                       |                           |           | 0.26(11) |           |           |           |              |
| 700                    | 93.7(9)                       |                           | 1.0(3)    | 0.4(3)   |           |           |           | 0.7(3)       |
| 600                    | 95.6(7)                       |                           | 1.5(3)    | 0.25(9)  |           |           |           |              |
| 500                    | 93.6(1.0)                     | 2.3(8)                    | 1.4(3)    | 0.26(10) |           |           |           |              |
| 400                    | 75.2(1.0)                     | 21.6(8)                   | 0.8(2)    | 0.32(15) | 0.5(3)    |           |           |              |
| 300                    | 45(4)                         | 48(4)                     | 1.9(5)    | 0.8(2)   | 0.8(4)    |           |           | 0.4(2)       |
| 200                    | 26(3)                         | 65(4)                     | 1.7(5)    | 0.8(2)   | 1.2(4)    |           |           |              |
| 100                    | 18(2)                         | 77(3)                     | 1.7(5)    | 1.2(3)   |           |           |           |              |
| 25                     | 1.7(9)                        | 87.4(1.3)                 | 0.5(3)    | 1.3(2)   | 1.1(3)    |           |           | 1.0(3)       |
| <b>D1 600</b>          |                               |                           |           | 18.8(6)  | 79.1(7)   |           | 0.52(16)  |              |
| 700                    | 16.1(7)                       |                           |           | 17.5(2)  | 63.4(9)   | 0.9(2)    | 0.42(14)  |              |
| 800                    | 38.2(6)                       |                           |           | 14.6(4)  | 1.0(2)    | 38.0(5)   | 0.25(8)   | 4.6(4)       |
| 900                    | 50.1(5)                       |                           |           | 11.6(3)  |           | 28.3(3)   | 0.35(6)   | 8.0(3)       |
| 1000                   | 64.4(5)                       |                           | 1.9(2)    | 7.9(2)   |           | 16.26(17) | 0.21(6)   | 4.6(2)       |
| 900                    | 67.7(6)                       |                           | 2.5(3)    | 7.6(3)   |           | 14.6(2)   |           | 2.9(3)       |
| 800                    | 68.7(6)                       |                           | 2.7(2)    | 7.9(3)   |           | 14.0(2)   |           | 2.7(2)       |
| 700                    | 66.9(7)                       |                           | 3.0(2)    | 9.1(4)   |           | 14.3(2)   | 0.3(2)    | 2.5(2)       |
| 600                    | 67.6(7)                       |                           | 2.7(2)    | 8.3(3)   | 4.02(13)  | 11.44(17) |           | 2.09(19)     |
| 500                    | 63.6(7)                       | 3.1(4)                    | 1.9(2)    | 9.8(5)   | 3.9(2)    | 10.28(17) |           | 2.3(3)       |
| 400                    | 58.4(7)                       | 7.4(6)                    | 1.40(17)  | 10.0(4)  | 4.3(2)    | 10.59(18) |           | 2.5(2)       |
| 300                    | 45.7(7)                       | 17.9(6)                   | 2.5(2)    | 9.1(4)   | 4.5(3)    | 11.0(2)   |           | 2.4(2)       |
| 200                    | 30.6(7)                       | 32.3(7)                   | 2.1(2)    | 9.6(5)   | 5.1(3)    | 11.4(2)   |           | 2.3(2)       |
| 100                    | 20.5(7)                       | 41.6(8)                   | 2.2(2)    | 9.4(5)   | 5.6(3)    | 12.1(2)   | 0.8(3)    | 2.3(2)       |
| 25                     | 14.6(8)                       | 46.7(1.6)                 | 1.95(18)  | 9.4(4)   | 6.7(3)    | 12.0(4)   | 0.52(14)  | 2.46(19)     |
| <b>D2 600</b>          |                               |                           |           | 20.3(6)  | 65.9(1.0) |           | 10.6(9)   |              |
| 700                    | 20.0(1.0)                     |                           |           | 18.2(6)  | 47.0(1.1) | 0.6(2)    | 11.6(9)   |              |
| 800                    | 51.8(1.0)                     |                           |           | 11.7(4)  |           | 26.7(6)   | 5.9(4)    | 2.9(4)       |
| 900                    | 61.9(1.5)                     |                           | 0.5(2)    | 7.4(5)   |           | 20.7(6)   | 5.6(5)    | 1.3(3)       |
| 1000                   | 72.5(7)                       |                           | 8.1(2)    | 5.1(3)   |           | 1.93(6)   | 6.90(17)  | 1.13(14)     |
| 900                    | 73.7(5)                       |                           | 10.0(2)   | 4.45(10) |           | 0.29(129) | 5.0(2)    | 0.49(17)     |
| 800                    | 73.9(6)                       |                           | 10.0(2)   | 4.32(10) |           | 0.38(13)  | 4.7(2)    | 0.32(17)     |
| 700                    | 74.5(5)                       |                           | 9.5(2)    | 4.1(10)  |           | 0.34(10)  | 4.6(19)   | 0.39(17)     |
| 600                    | 72.5(6)                       |                           | 9.8(3)    | 4.87(18) |           | 0.37(10)  | 5.1(2)    | 0.44(17)     |
| 500                    | 73.0(7)                       | 0.8(3)                    | 9.9(2)    | 4.4(4)   |           | 0.65(6)   | 4.7(2)    | 0.57(17)     |
| 400                    | 50.3(6)                       | 22.8(5)                   | 10.4(3)   | 4.9(4)   | 0.3(2)    | 0.66(6)   | 5.0(2)    | 0.6(2)       |
| 300                    | 31.1(1.3)                     | 42(2)                     | 10.3(4)   | 3.9(4)   | 0.6(2)    | 0.67(9)   | 4.9(3)    | 0.8(2)       |
| 200                    | 18.5(1.0)                     | 52.8(1.9)                 | 9.8(5)    | 4.3(4)   | 0.78(19)  | 0.91(10)  | 5.0(3)    | 0.9(2)       |
| 100                    | 12.2(9)                       | 59.6(1.7)                 | 10.6(5)   | 3.4(4)   | 0.8(2)    | 0.90(10)  | 4.9(3)    | 0.89(2)      |
| 25                     | 5.9(5)                        | 65.2(9)                   | 11.0(3)   | 3.7(2)   | 0.84(16)  | 1.10(7)   | 4.47(17)  | 0.86(18)     |
| <b>D3 600</b>          |                               |                           |           | 20.2(6)  | 65.0(1.0) |           | 11.2(9)   |              |
| 700                    | 30.8(9)                       |                           |           | 15.3(5)  | 37.4(1.0) | 0.7(2)    | 13.3(8)   |              |
| 800                    | 55(2)                         |                           |           | 11.8(6)  |           | 22.3(9)   | 7.3(5)    | 1.9(5)       |
| 900                    | 70(2)                         |                           | 0.3(2)    | 5.0(4)   |           | 13.1(5)   | 8.7(5)    | 0.7(2)       |
| 1000                   | 74.2(6)                       |                           | 9.2(3)    | 4.9(2)   |           | 0.90(10)  | 5.1(2)    | 1.2(2)       |
| 900                    | 74.6(7)                       |                           | 10.1(3)   | 3.0(3)   |           | 0.26(5)   | 3.4(2)    | 0.8(3)       |
| 800                    | 74.(6)                        |                           | 10.1(3)   | 3.0(4)   |           | 0.24(5)   | 4.0(2)    | 0.9(3)       |
| 700                    | 73.5(7)                       |                           | 10.4(3)   | 4.5(4)   |           | 0.33(6)   | 3.5(2)    | 1.0(2)       |
| 600                    | 73.2(7)                       |                           | 10.6(3)   | 4.7(3)   |           | 0.25(5)   | 3.8(2)    | 0.7(3)       |
| 500                    | 74.8(8)                       | 0.9(3)                    | 10.2(3)   | 3.0(4)   |           | 0.25(6)   | 3.6(29)   | 0.74(19)     |

|     |           |           |         |        |          |          |          |          |
|-----|-----------|-----------|---------|--------|----------|----------|----------|----------|
| 400 | 53.9(7)   | 20.3(5)   | 10.6(3) | 3.2(4) | 1.0(3)   | 0.23(6)  | 3.6(2)   | 0.9(3)   |
| 300 | 32.5(1.4) | 42(2)     | 9.8(4)  | 2.1(4) | 1.0(2)   | 0.15(6)  | 3.5(2)   | 0.9(2)   |
| 200 | 20.2(1.2) | 50(2)     | 11.1(6) | 3.2(5) | 0.7(2)   | 0.38(11) | 4.0(3)   | 1.2(3)   |
| 100 | 11.8(9)   | 61.0(1.7) | 9.8(5)  | 3.4(5) | 0.9(2)   | 0.19(6)  | 3.7(2)   | 1.0(2)   |
| 25  | 5.6(5)    | 64.7(1.0) | 11.1(3) | 4.1(2) | 0.77(16) | 0.50(7)  | 4.00(17) | 1.06(18) |

---
